# Supplementary material for: Specification of Neck Muscle Dysfunction through Digital Image Analysis Using Machine Learning
Source: MDPI journal article supplement (doi:10.3390/diagnostics13010007), 2022-12-21
Supplement: s1 [file s1]

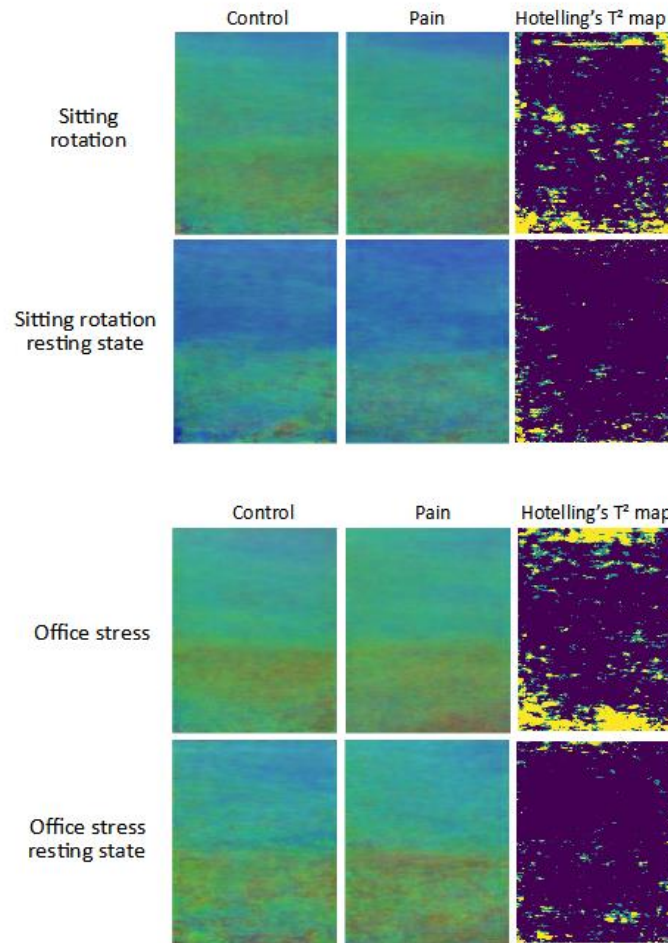

**Figure S1.** Summary mean images of the elastograms' RGB values; a) Comparison between neck muscle rotation and resting state while sitting; b) Comparison between office stress and resting state; Hotelling's  $T^2$  test map – green color p-value < 0.05 – yellow color p-value < 0.01.

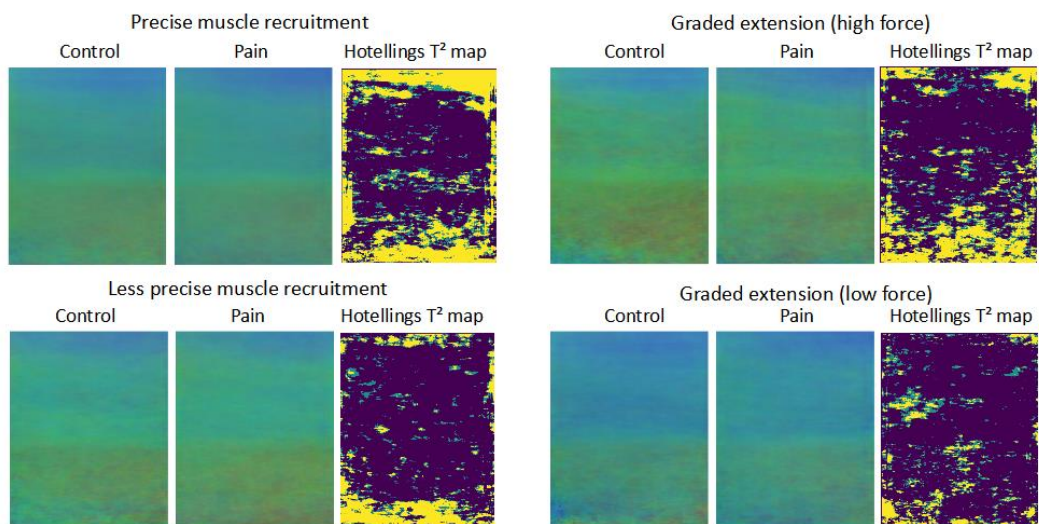

**Figure S2.** Summary mean images of the elastograms' RGB values; a) Comparison between activities that require precise and less precise neck muscle recruitment; b) Comparison between high force and low force graded extension of the neck muscles; Hotelling's  $T^2$  test map – green color p-value < 0.05 – yellow color p-value < 0.01.

**Table S1.** The overview of the hyper-parameter grid used for the training of the models. The names of the hyper-parameters are same as in the respective scikit-learn model class.

| Models                 | Hyper-parameters | Values                            |
|------------------------|------------------|-----------------------------------|
| K-Nearest Neighbors    | leaf_size        | 10, 15, 20, 25                    |
|                        | n_neighbors      | 3, 5, 7, 9, 11                    |
|                        | weights          | uniform, distance                 |
|                        | p                | 1, 2                              |
| Logistic Regression    | penalty          | l1, l2, elasticnet                |
|                        | C                | 1, 10, 100                        |
|                        | solver           | liblinear, saga                   |
|                        | max_iter         | 300                               |
| Naïve Bayes            | var_smoothing    | 1e-11, 1e-10, 1e-09, 1e-08, 1e-07 |
| Decision Tree          | criterion        | gini, entropy, log_loss           |
|                        | splitter         | best, random                      |
|                        | max_depth        | 50, 100, None                     |
| Support Vector Machine | kernel           | rbf, poly, sigmoid                |
|                        | C                | 1, 10, 100                        |
|                        | gamma            | auto, scale                       |
|                        | coef0            | 0.0, 0.2                          |
| Random Forest          | n_estimators     | 1000                              |
|                        | criterion        | gini, entropy, log_loss           |
|                        | max_depth        | 50, 100, None                     |
|                        | max_features     | sqrt, log2                        |
